# Supplementary material for: Common and Unique Contributions of Decorin-Binding Proteins A and B to the Overall Virulence of Borrelia burgdorferi
Source: PubMed Central journal article supplement (PMC2556102; doi:10.1371/journal.pone.0003340), 2008-10-03

A

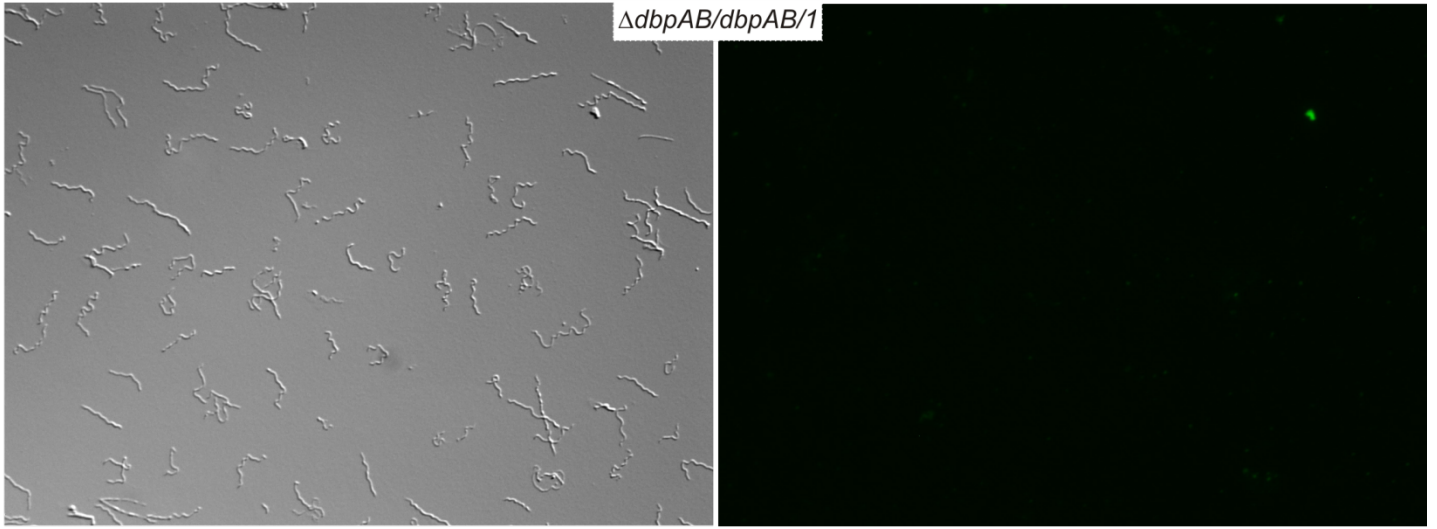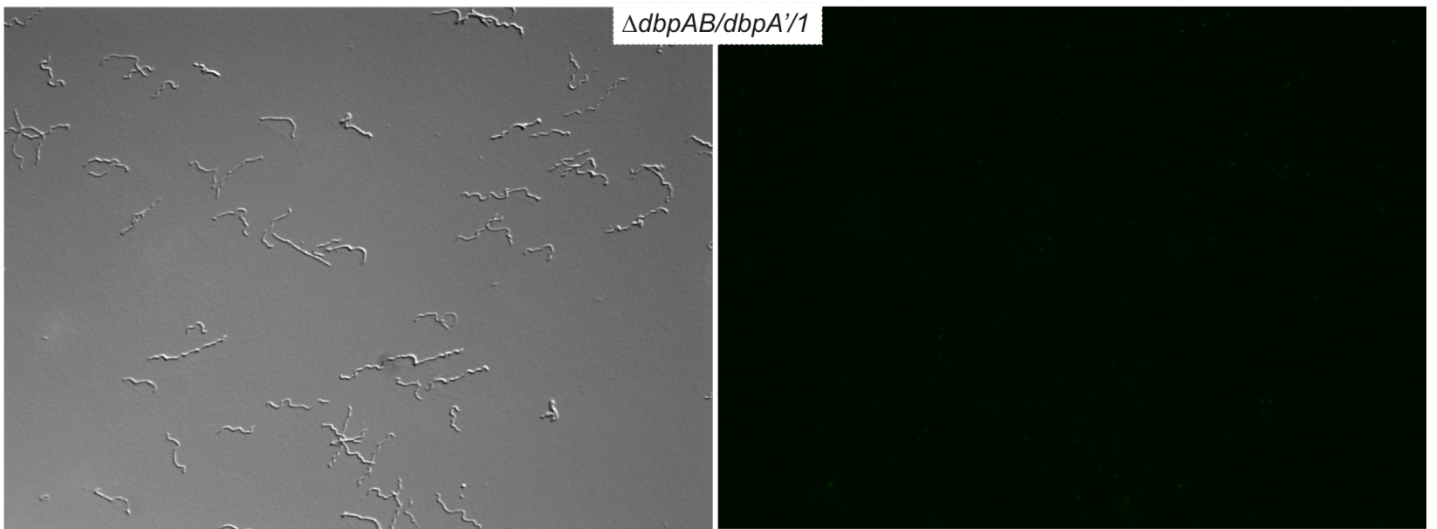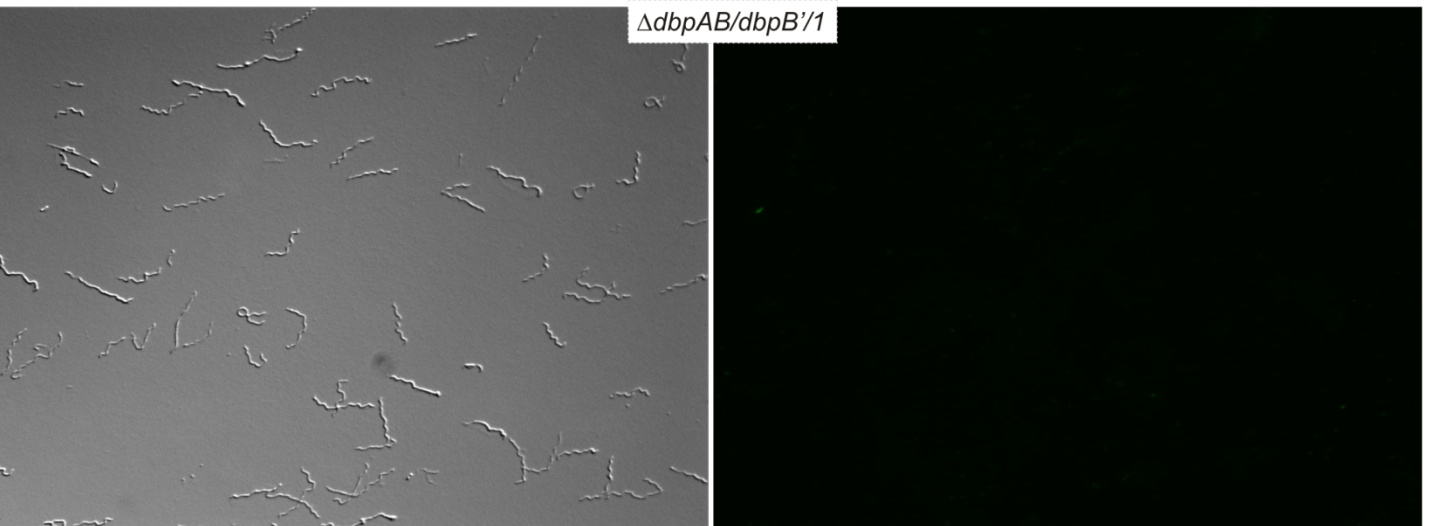

B

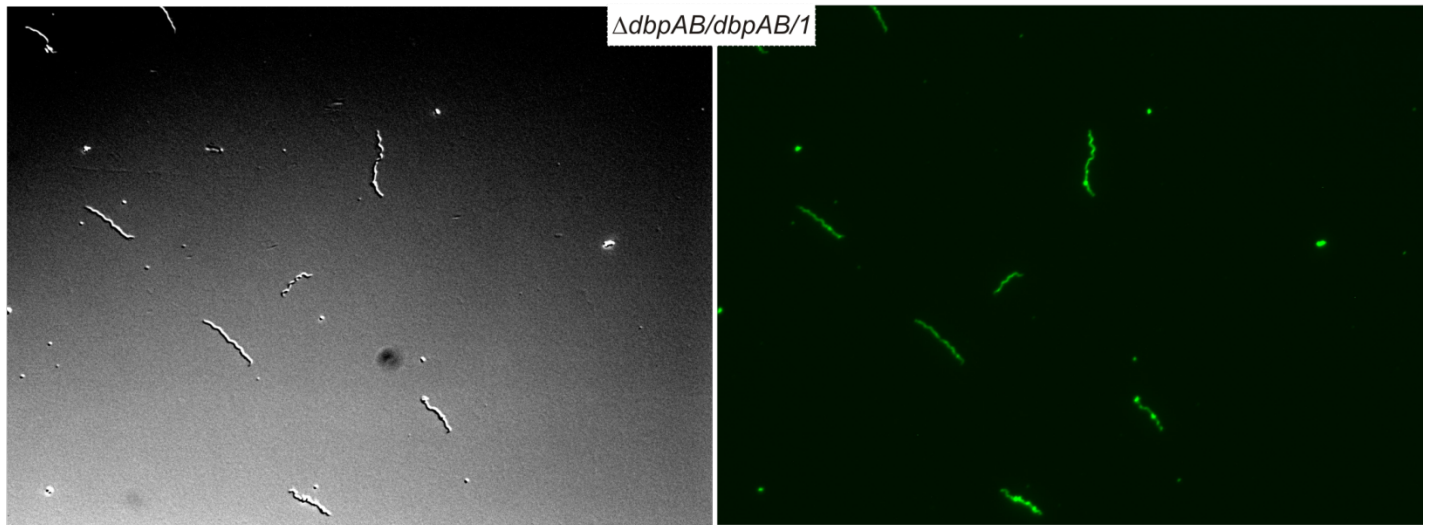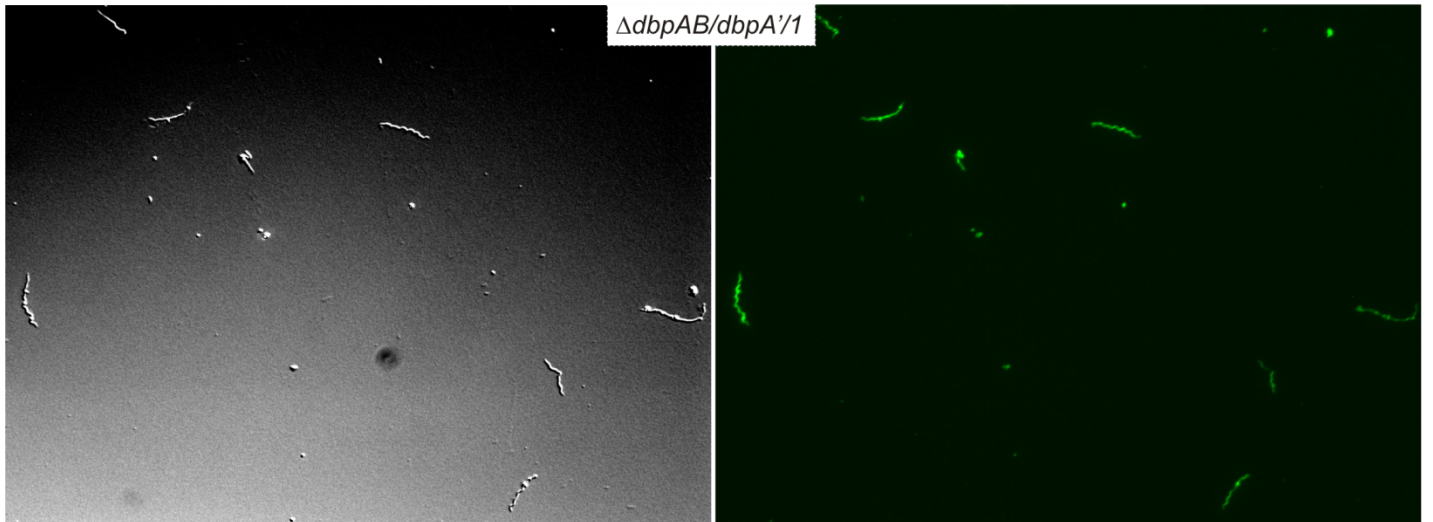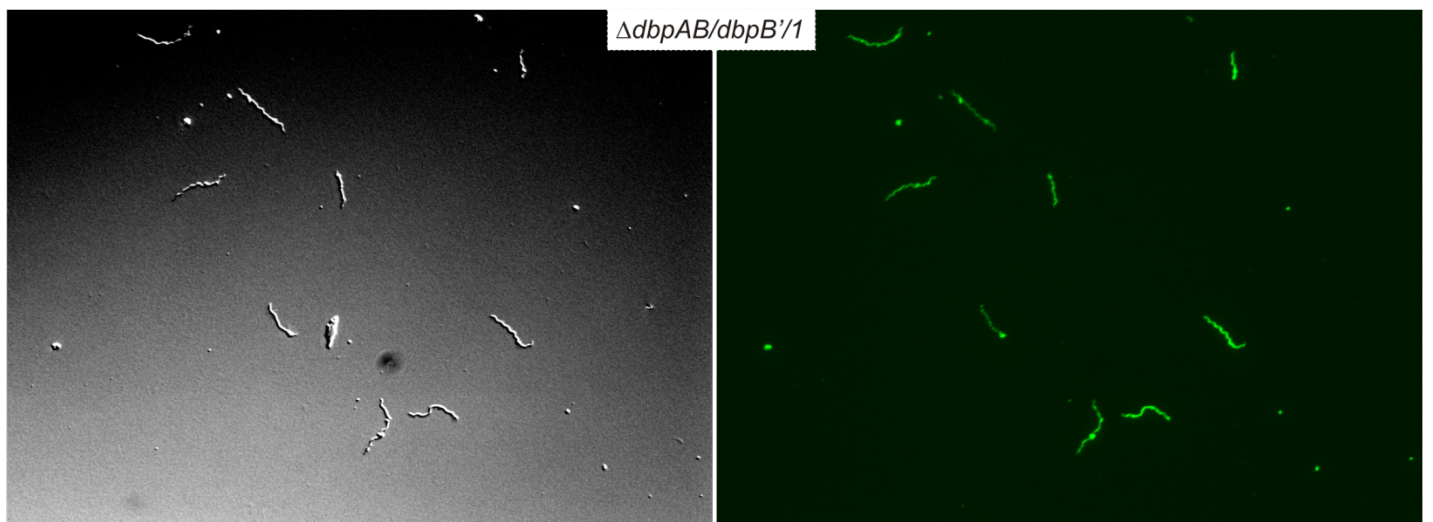

C

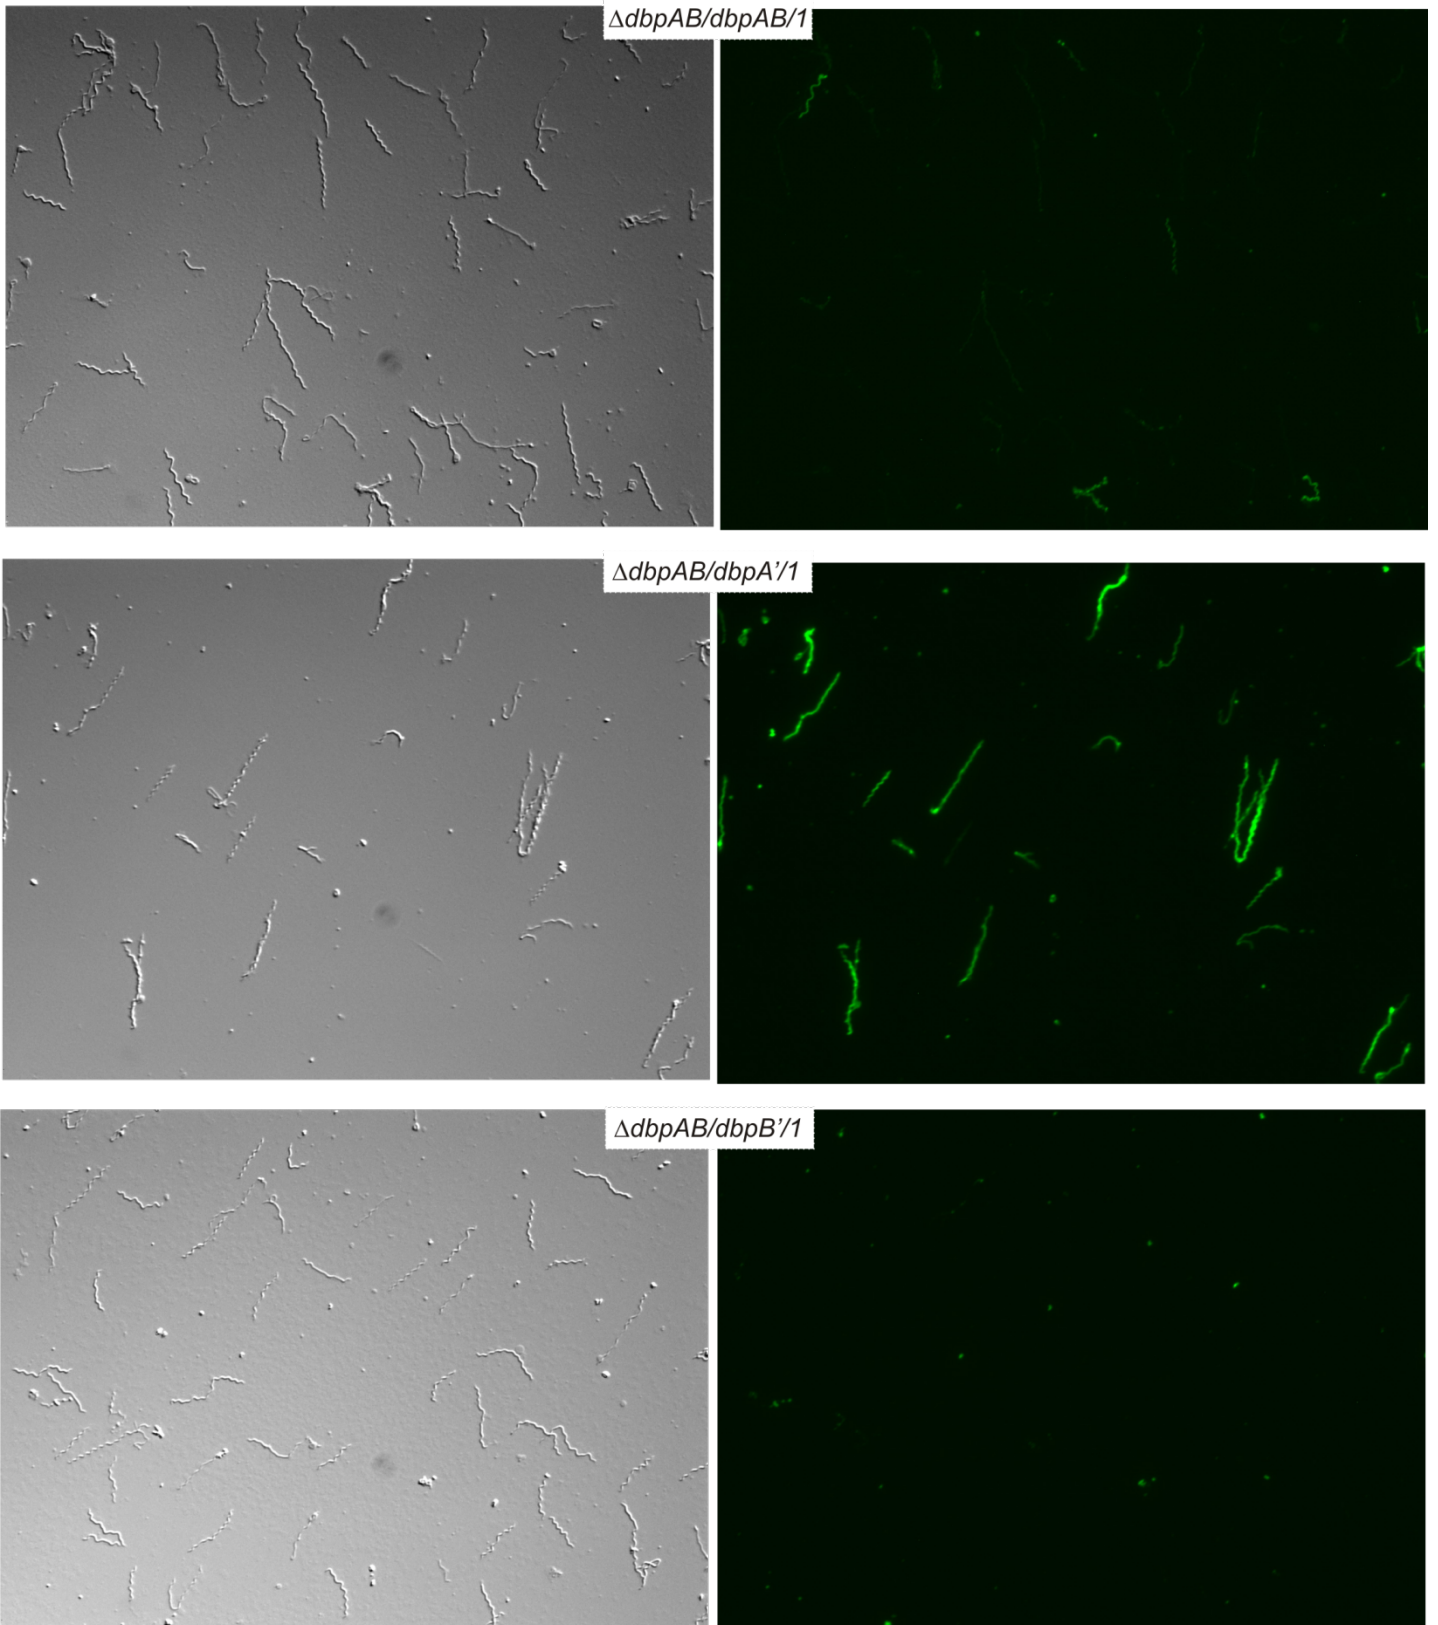

D

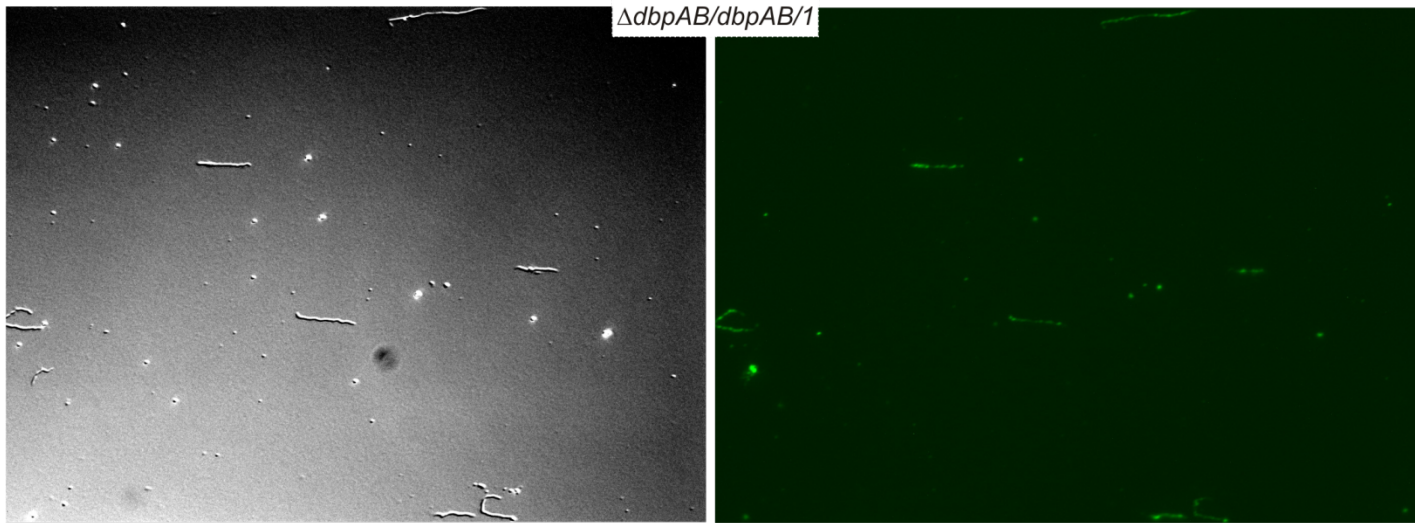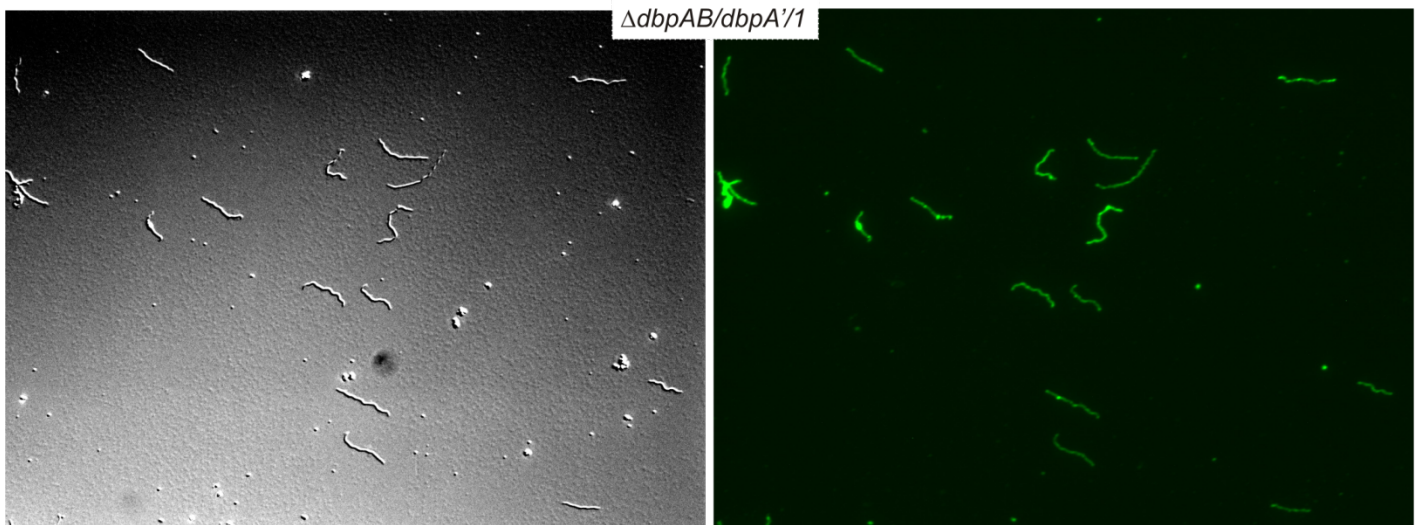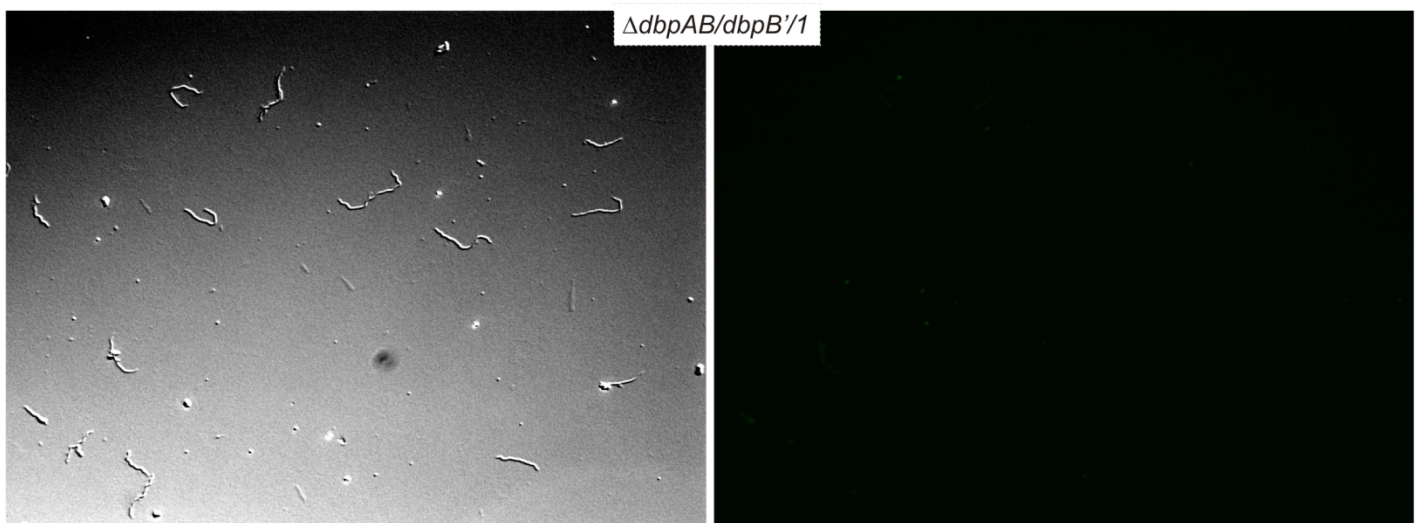

E

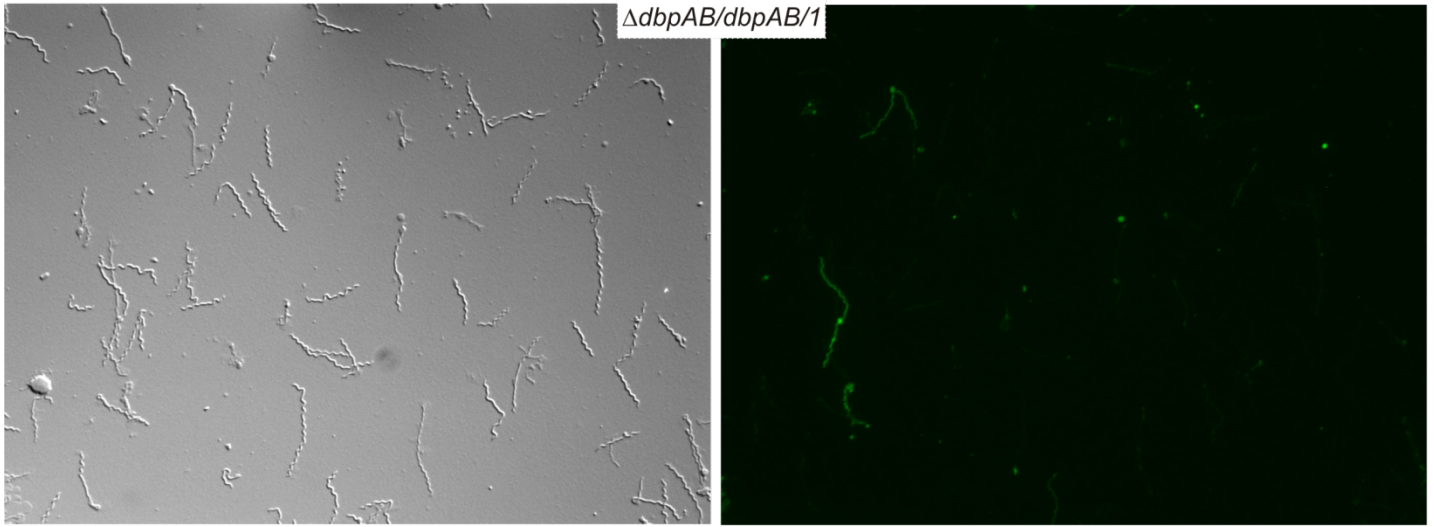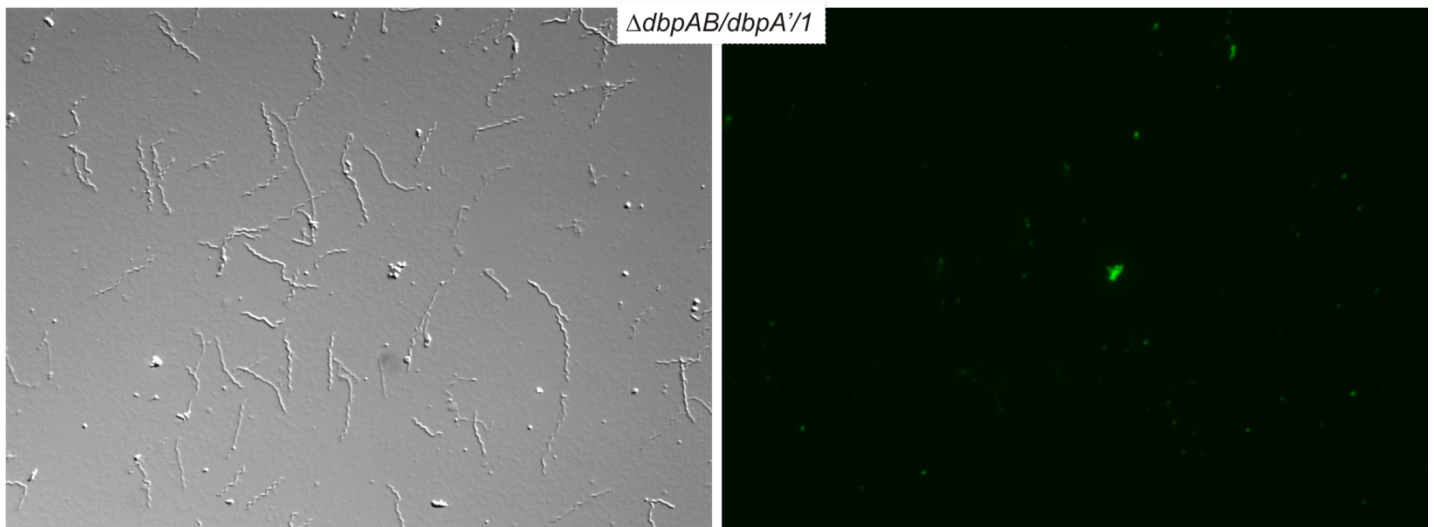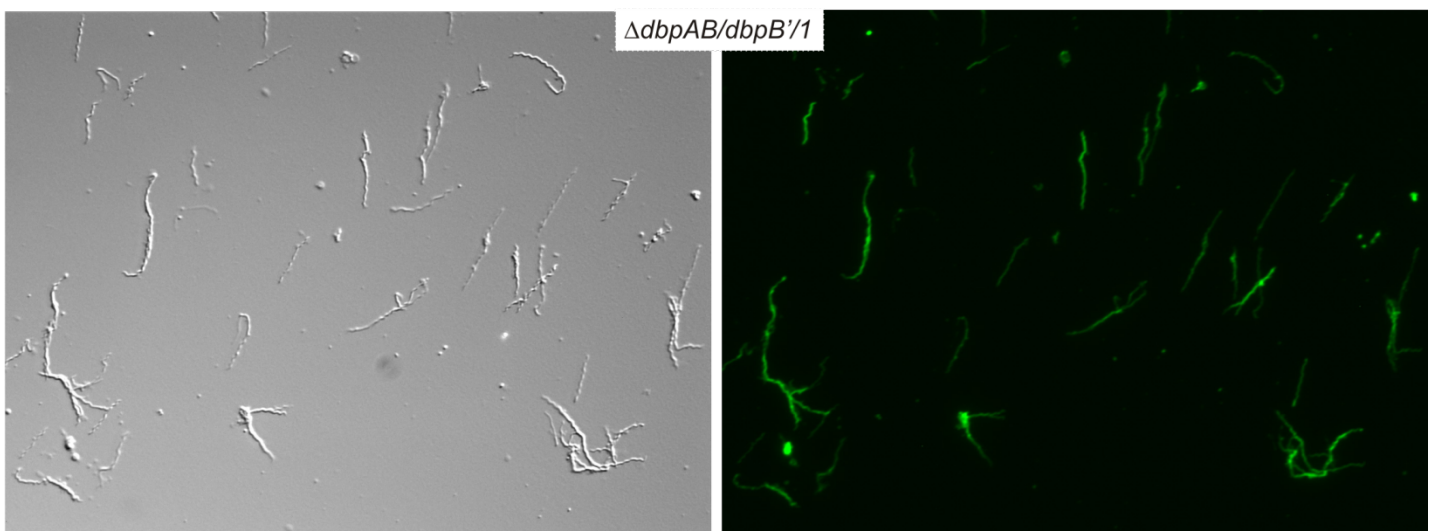

F

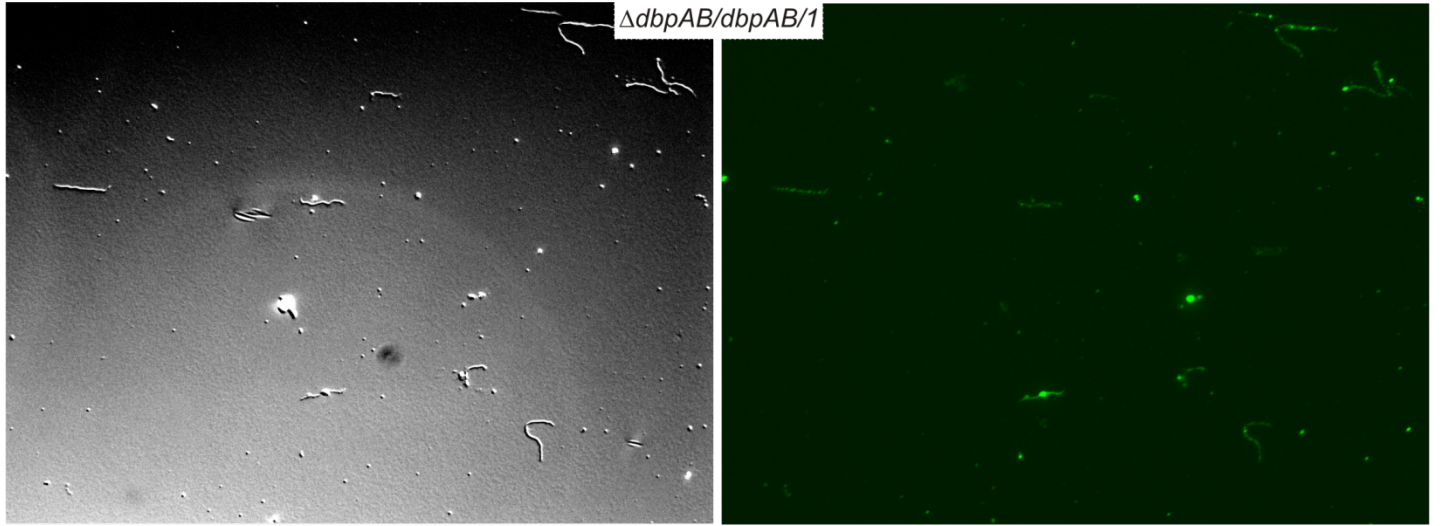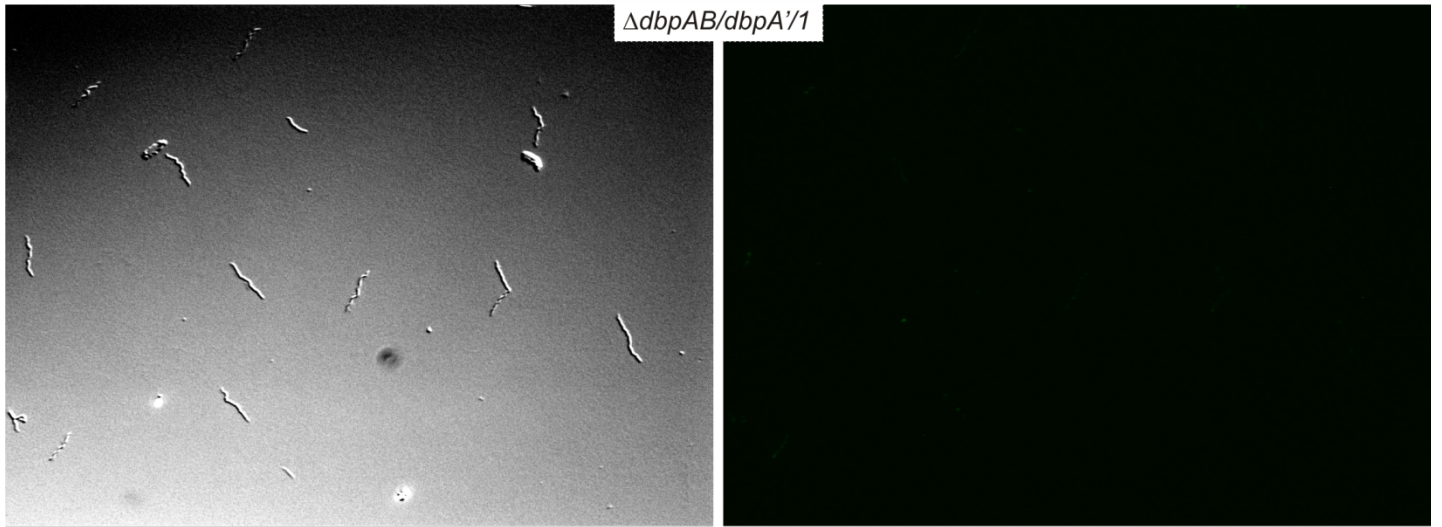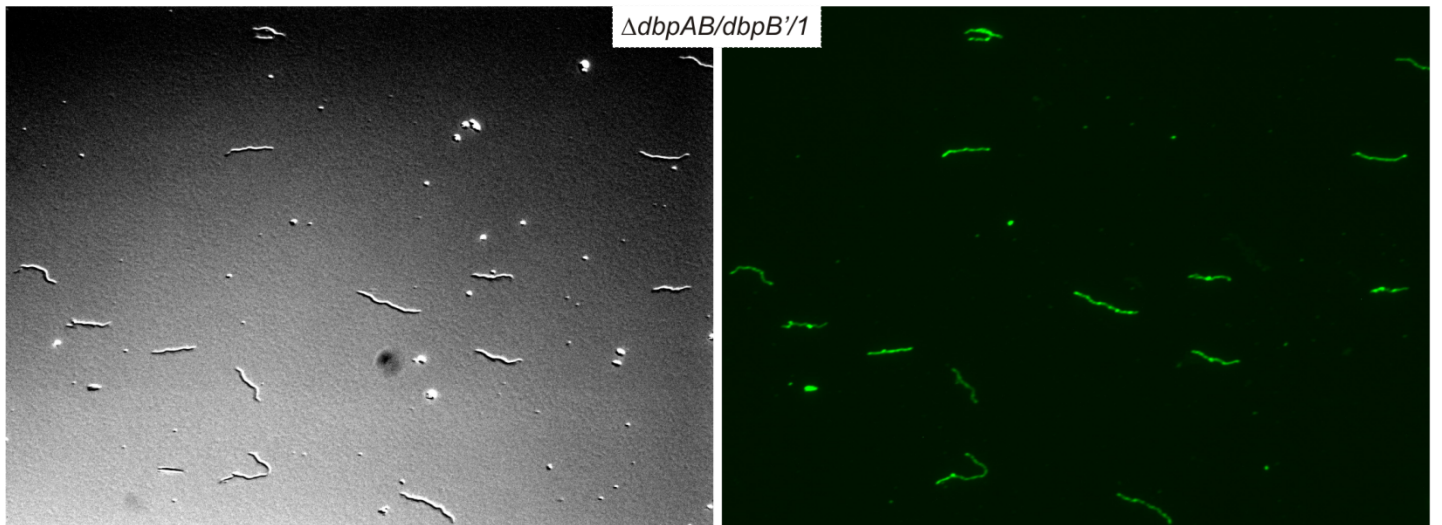

Supplement: pone.0003340.s001.pdf [file pone.0003340.s001.pdf]
